# Supplementary material for: An Analysis of Semicircular Channel Backscattering Interferometry through Ray Tracing Simulations
Source: MDPI journal article supplement (doi:10.3390/s22114301), 2022-06-06
Supplement: s1 [file s1]

# Supplementary Information - An Analysis of Semicircular Channel Backscattering Interferometry Through Ray Tracing Simulations

Niall M. C. Mulkerns,<sup>†,‡</sup> William H. Hoffmann,<sup>†,‡,¶</sup> Ian D. Lindsay,<sup>†,‡</sup> and  
Henkjan Gersen<sup>\*,†,‡</sup>

<sup>†</sup>*H. H. Wills Physics Laboratory, University of Bristol, UK*

<sup>‡</sup>*Bristol Centre for Functional Nanomaterials, University of Bristol, UK*

<sup>¶</sup>*School of Chemistry, University of Bristol, UK*

E-mail: h.gersen@bristol.ac.uk

Unless otherwise explicitly stated, all variables within the Supporting Information are as defined within the main body of the text.

## General Channel Intersection Position Formula

The  $x$  position of the first intersection of the ray with the radius of the channel  $x_\theta$  in the general case of  $\psi \neq 0$  can be written

$$x_\theta = \cos^2(\epsilon) \left( -t \tan(\omega) - x \pm \tan(\epsilon) \sqrt{r^2 \tan^2(\epsilon) + r^2 - t^2 \tan^2(\omega) - 2tx \tan(\omega) - x^2} \right), \quad (\text{S1})$$

by rearranging Eq. 2, which was solved using the symbolic mathematics package `sympy` (version 1.1.1) in Python3. In this work, the negative root was used

## Oblique Fringe Pattern

Fig. S1 shows the observed fringe pattern at the detector plane for an incident angle of  $\psi = 3^\circ$ , with all other parameters as defined in the text. The fringes bear a high degree of similarity to those in Fig. 5, with a small reduction in the overall intensity of the  $p$ -polarised case. This is due to the fact that as the angle increases, the magnitude of the reflection coefficient decreases for  $p$ -polarised light, but increases for  $s$ -polarised light, causing small discrepancies in the fringe intensities.

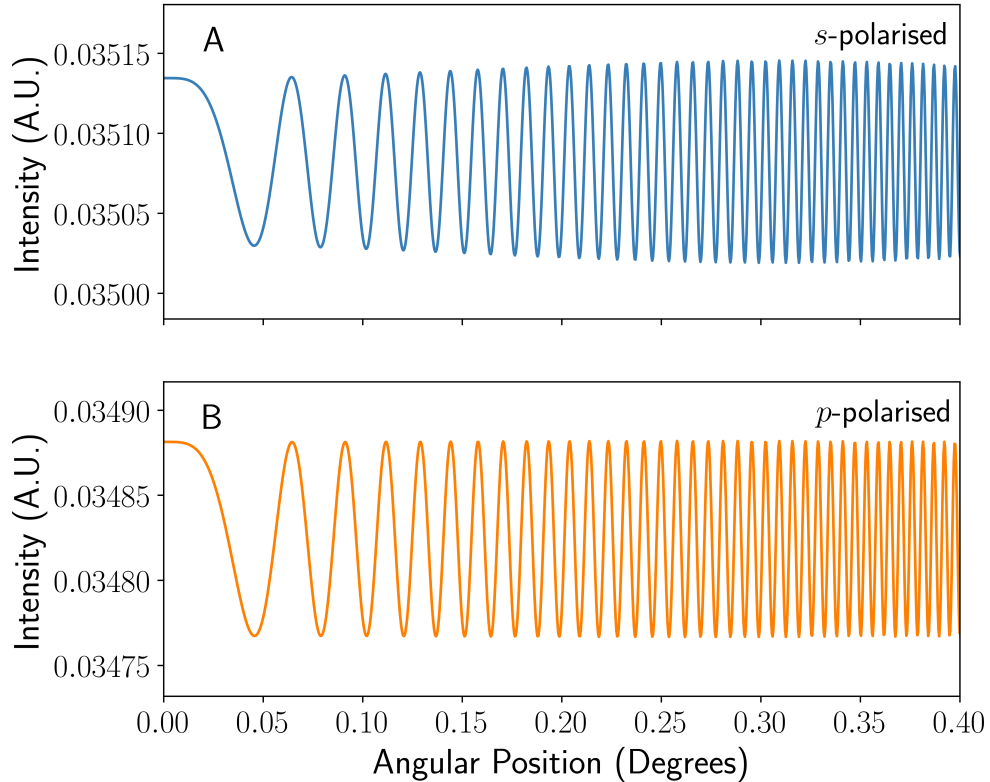

Figure S1: Graphs showing the interference patterns seen on a detector for an incident angle of  $\psi = 3^\circ$  using the parameters as set out in the main body of text at a distance of 1 m with the angle given from the line of  $x = 0$ . A shows the interference pattern for  $s$ -polarised incident light, whereas B shows the pattern imaged for  $p$ -polarised light.
